# Supplementary material
Source: PubMed Central journal article supplement (PMC4113327)
Supplement: NIHMS605043-supplement-1.pdf [file NIHMS605043-supplement-1.pdf]

**Supplemental Table 1. Oligonucleotides for amplification and sequencing of the zebrafish Ae3.**

| OLIGO <sup>a</sup> | SEQUENCE                        | Dir. | Location  | Use                   | Position<br>in Ref(nt) | Reference |
|--------------------|---------------------------------|------|-----------|-----------------------|------------------------|-----------|
| F1                 | 5'-AATGCTAGATCTGGATCAAACC-3'    | For  | Exon 9    | PCR and Seq           | 1286-1307              | KF771000  |
| F2                 | 5'-CGCCCACTTGATGGTGGAAACC-3'    | For  | Exon 9    | PCR and Seq           | 1322-1343              | KF771000  |
| F3                 | 5'-CGAGTCTATCCTGCTGGAGTCCA-3'   | For  | Exon 12   | PCR and Seq           | 1733-1755              | KF771000  |
| F4                 | 5'-TGGATCGGGTTCTGGCTCATC-3'     | For  | Exon 16   | Seq                   | 2502-2522              | KF771000  |
| F5                 | 5'-CACCGCTTCGAGGACAATCCTG-3'    | For  | Exon 7    | Seq                   | 957-978                | KF771000  |
| F6                 | 5'-GAAGGACTCCACAGCAGGACAG-3'    | For  | Exon 3    | PCR and Seq           | 170-191                | KF771000  |
| F7                 | 5'-TGAAGAGCTGCCACAGCTCAG-3'     | For  | Exon 4-5  | PCR and Seq           | 542-562                | KF771000  |
| R1                 | 5'-CATGGGCTTTTCTCCGGGTGCAGTG-3' | Rev  | Exon 20   | PCR and Seq           | 3311-3287              | KF771000  |
| R2                 | 5'-AAAACCAGCAGGGCCGGGATCACAG-3' | Rev  | Exon 19   | PCR and Seq           | 3079-3055              | KF771000  |
| R3                 | 5'-CCGGGAACGGCTGTTTATCTCCA-3'   | Rev  | Exon 19   | PCR and Seq           | 3036-3014              | KF771000  |
| R4                 | 5'-AAGCGCTCGCAGCACATTGGCTCG-3'  | Rev  | Exon 9    | 5'-RACE, Seq          | 1400-1377              | KF771000  |
| R5                 | 5'-GGTCTTCAGCTCTGATCTGGTCC-3'   | Rev  | Exon 9    | 5'-RACE, Seq          | 1377-1355              | KF771000  |
| R6                 | 5'-GTGGAAGTTGACAGCGCGATG-3'     | Rev  | Exon 7    | 5'-RACE, Seq          | 1026-1006              | KF771000  |
| R7                 | 5'-TCTTGACGAGGTGACGTCAAC-3'     | Rev  | Exon 7    | 5'-RACE, Seq          | 1002-981               | KF771000  |
| R8                 | 5'-TCTGCGCCATTGACGGCAGACTC-3'   | Rev  | Exon 3    | 5'-RACE, Seq          | 271-249                | KF771000  |
| R9                 | 5'-CGAACCTCTCCACAGACAAGG-3'     | Rev  | Exon 3    | 5'-RACE, Seq          | 234-214                | KF771000  |
| R10                | 5'-CTCAGTAATGATGTCCCCGAAC-3'    | Rev  | Exon 3    | 5'-RACE, Seq          | 230-251                | KF771000  |
| R11                | 5'-GATGGGCTAAAGCTGTTGGAG-3'     | Rev  | Exon 5-6  | PCR and Seq           | 745-724                | KF771000  |
| R12                | 5'-ATGGAAGCTGCTGAGAGGGAG-3'     | Rev  | Exon 5    | Seq                   | 614-594                | KF771000  |
| 3R1                | 5'-GCAGTTCCTTCTGACTCCATAC-3'    | Rev  | 3'-UTR    | PCR and Seq           | 3855-3834              | KF771000  |
| 3R2                | 5'-GAGCAAGGACATTTTCTGTATCC-3'   | Rev  | 3'-UTR    | PCR and Seq           | 4377-4355              | KF771000  |
| 3R3                | 5'-CTGGTCTGAGTGCTATAAATCAG-3'   | Rev  | 3'-UTR    | PCR for <i>IS pr.</i> | 4577-4555              | KF771000  |
| TF                 | 5'-GTGTAGATGACCAATCACTGACC-3'   | For  | Ct-3'-UTR | PCR for <i>IS pr.</i> | 3783-3805              | KF771000  |
| MSLY.F1            | 5'-CTTTCATGGCACTTCACCTGCTG-3'   | For  |           | PCR                   | 3681-3703              | FP243360  |

|         |                                    |     |                               |             |           |          |
|---------|------------------------------------|-----|-------------------------------|-------------|-----------|----------|
| MSLY.F2 | 5'-GGGTGTACATTACAACCTGTGCTTC-3'    | For |                               | PCR         | 3705-3728 | FP243360 |
| MLSS.F1 | 5'-ACAGCGTGCAGACATGGAGAGC-3'       | For |                               | PCR         | 5036-5057 | FP243360 |
| MSVL.F1 | 5'-TAAGGTACAAAATGTCAGTCTTAGCAGG-3' | For |                               | PCR         | 5270-5297 | FP243360 |
| MLDA.F1 | 5'-CCTGCAAATCACTCATGCTTGAC-3'      | For |                               | PCR         | 6341-6363 | FP243360 |
| MDMV.F1 | 5'-GTGAAACAGTCCAACGGTGATG-3'       | For | Ex 2 (1-22) <sup>b</sup>      | PCR and Seq | 7962-7983 | FP243360 |
| MDMV.F2 | 5'-CTGTATATGAGGTAGTGGTGAGG-3'      | For |                               | PCR         | 7940-7962 | FP243360 |
| MDMV.F3 | 5'-TCCAACGGTGATGGATATGGTAG-3'      | For | Ex 2 (10-32) <sup>b</sup>     | PCR and Seq | 7971-7993 | FP243360 |
| MDMV.F4 | 5'-AGACGGAGCTGGGATGCTCAAG-3'       | For | Ex 2 (127-148) <sup>b</sup>   | PCR         | 8088-8109 | FP243360 |
| MDMV.F5 | 5'-CAATCAGCAGCCACAGAACC-3'         | For | Ex 2 (94-115) <sup>b</sup>    | PCR         | 8055-8076 | FP243360 |
| MILK.F1 | 5'-AGGCACTGCTGACCAATGATCC-3'       | For |                               | PCR         | 8137-8158 | FP243360 |
| MLNR.F1 | 5'-GGGATATGACACTTGCATGCTG-3'       | For |                               | PCR         | 8523-8544 | FP243360 |
| MSLG.F1 | 5'-GGGCTACGTTTCCAGAATGAGC-3'       | For | Intr 2 (1-22) <sup>c</sup>    | PCR         | 9152-9173 | FP243360 |
| MSLG.F2 | 5'-AGGCTGTTAGAGCCTGGAAAGC-3'       | For | Intr 2 (35-56) <sup>c</sup>   | PCR and Seq | 9186-9207 | FP243360 |
| MSLG.F3 | 5'-CAGCATGTGGAACATCTGGTGC-3'       | For | Intr 2 (419-440) <sup>c</sup> | PCR         | 9570-9591 | FP243360 |
| MSLG.F4 | 5'-TCCTCAGAGCGTGCCAGAAGAC-3'       | For | Intr 2 (350-371) <sup>c</sup> | PCR         | 9501-9522 | FP243360 |

<sup>a</sup>. "M series" oligonucleotides named according to the putative initiator Met sequence intended for amplification.

<sup>b</sup>. As in KF771000.

<sup>c</sup>. As in KF771001.
