# Supplementary material
Source: PubMed Central journal article supplement (PMC4113327)
Supplement: NIHMS605043-supplement-2.pdf [file NIHMS605043-supplement-2.pdf]

Supplemental Table 2.

Exon-Intron Boundaries of the Zebrafish\* *slc4a3/ae3* Gene.

| Exon |                |                              | Intron      |    |            | Exon        |                               |    |
|------|----------------|------------------------------|-------------|----|------------|-------------|-------------------------------|----|
| #    | Size: Z/M      | 3' Junction                  | 5' Junction | #  | Size: Z/M  | 3' Junction | 5' Junction                   | #  |
| 1    | Not found/>117 |                              |             |    | ?/387      | Unknown     | GTGAAACAGT                    | 2  |
| 2    | >152/150       | CTCAAGCCAG                   | gtaagaggtg  | 2  | 1512/311   | tcgtttgacag | GTTTTGACAG                    | 3  |
| 3    | 157/166        | TTT GAG T<br>10-Phe Glu T    | gtgagtactg  | 3  | 5710/545   | gttttctcag  | AT CAC CGG<br>yr His Arg-14   | 4  |
| 4    | 248/278        | CCA CAG<br>93-Pro Gln        | gtaacctgaa  | 4  | 691/94     | gatctcacag  | CTC AGT<br>Leu Ser-96         | 5  |
| 5    | 176/116        | TCC AAC AG<br>151-Ser Asn Se | gtatttgact  | 5  | 5372/437   | tgtttgacag  | C TTT AGC<br>r Phe Ser-155    | 6  |
| 6    | 221/197        | ATG AAA A<br>225-Met Lys S   | gtaagcaaag  | 6  | 20297/1438 | tgactttaag  | GT CAC CGC<br>er His Arg-229  | 7  |
| 7    | 143/149        | CAT GAG<br>273-His Glu       | gtgagagctg  | 7  | 5481/102   | tttactgcag  | GTG TTT<br>Val Phe-276        | 8  |
| 8    | 181/181        | ACA CAC G<br>333-Thr His G   | gtgagagttc  | 8  | 7978/311   | tgttaccag   | GT GCC ATA<br>ly Ala Ile-337  | 9  |
| 9    | 136/136        | AAA CAC AG<br>378-Lys His Se | gttagtgag   | 9  | 5872/254   | ttaaaccag   | T CAC CCC<br>r His Pro-382    | 10 |
| 10   | 166/184        | AAA GAG<br>434-Lys Glu       | gtgttttag   | 10 | 5885/332   | tccacaaaag  | AAA AGC<br>Lys Ser-437        | 11 |
| 11   | 103/100        | TTA GTG G<br>468-Leu Val G   | gtaagcttcg  | 11 | 168/370    | gtgtttatag  | GG TGT GTG<br>ly Cys Val-472  | 12 |
| 12   | 185/185        | GAT AAG<br>530-Asp Lys       | gttgatatgc  | 12 | 8171/448   | ctctctgcag  | AAT TTC<br>Asn Phe-533        | 13 |
| 13   | 223/226        | ACC AAA G<br>604-Thr Lys A   | gtgaaataca  | 13 | 934/142    | tggtgcacag  | AC GTC AAT<br>sp Val Asn-608  | 14 |
| 14   | 219/219        | TTA TTA G<br>677-Leu Leu G   | GCaagtaaac  | 14 | 999/316    | ttgtatatag  | GT GAG AAG<br>ly Glu Lys-681  | 15 |
| 15   | 149/149        | TAT AAG<br>727-Tyr Lys       | gtatttcttg  | 15 | 124/193    | ttaatatcag  | TTC TGC<br>Phe Cys-730        | 16 |
| 16   | 195/195        | ATT AAG<br>792-Ile Lys       | gtacagattt  | 16 | 1288/240   | ttttcctcag  | GTG TTT<br>Val Phe-795        | 17 |
| 17   | 201/219        | GGA AAG<br>859-Gly Lys       | gtgtttagtg  | 17 | 1043/269   | attaccaaag  | GTC AGA<br>Val Arg-862        | 18 |
| 18   | 90/90          | ACA CAG<br>889-Thr Gln       | gtaaccacac  | 18 | 301/446    | gtggttgacag | AAA CTG<br>Lys Leu-892        | 19 |
| 19   | 167/167        | ATC ACC AC<br>944-Ile Thr Th | gtgagtaagc  | 19 | 1163/618   | tctttgacag  | A TTG ATC<br>r Leu Ile-948    | 20 |
| 20   | 254/254        | CTA GTG G<br>1029-Leu Val G  | gtaagaaaca  | 20 | 3669/274   | ttctgtgcag  | GG TTG TCT<br>ly Leu Ser-1033 | 21 |
| 21   | 170/170        | ACC AAG<br>1086-Thr Lys      | gtaaactctt  | 21 | 1598/188   | tgacacacag  | GTG AAG<br>Val Lys-1089       | 22 |
| 22   | 174/174        | GCA GCC<br>1144-Ala Ala      | gtaagttcgc  | 22 | 5390/972   | tttcctgcag  | TTG GAT<br>Leu Asp-1147       | 23 |
| 23   | >868           | TATAGCACTCAGAACCAG           |             |    |            |             |                               |    |

\* Exon and intron lengths compared to those of the mouse *Ae3* gene.
