# Supplementary material
Source: PubMed Central journal article supplement (PMC4113327)
Supplement: NIHMS605043-supplement-3.pdf [file NIHMS605043-supplement-3.pdf]

# Supplemental Figure 1

|       |                                                                                                                             |                                                               |    |
|-------|-----------------------------------------------------------------------------------------------------------------------------|---------------------------------------------------------------|----|
| zAe3  | M-----                                                                                                                      | -----GRSYNEKDFEYHRHTFHHTHHPSTHLP--QFRKRVLSMDRRRKRKRKKKKTSMPPS | 58 |
| hbAe3 | MANGVIPPGGASPLPQVRVPLEEPPLSPDVEEEDDLGKTLAVSRFGDLISKPPAWDPEKPSRSYSERDFEFHRHTSHHTHHPSTHLP--QFRKRVLSMDRRRKRKRKKKKTSMPPS        | 120                                                           |    |
| rbAe3 | MANGVIPPGGASPLPQVRVPLEEPPLSPDVEEEDDLGKTLAVSRFGDLISKTPAWDPEKPSRSYSERDFEFHRHTSHHTHHPSTHLP--QFRKRVLSMDRRRKRKRKKKKTSMPPS        | 120                                                           |    |
| zAe3  | DVTPTIHE-----VDEEFAESEIFGQCQAATPTTP----SEELPQLSLGSEEDLAADLPLSSFHMESERPASSEETLPSASMEEKEETQQPPDGGEHKDIS---NSFSPSPEAASMTTR     | 166                                                           |    |
| hbAe3 | EGTPPIQEEGGAGVDEEEEEEEEEEGESHAEPVPPPPSGTPQKAKFSIGSDED---DSP-----GLPGRAAV-----TKPLPSVGPHTDKSPQHSSSSSSPRARASRLA               | 216                                                           |    |
| rbAe3 | EGTPPIQEEGGAGVDEEEEEEEEEEGESHAEPVPPPPSGTPQKAKFSIGSDED---DSP-----GLS IKAP-----AKALPSVGLPSDQSPQRSGSSSPRARASRLA                | 216                                                           |    |
| zAe3  | GWFRKPVHRLAGAQRTSYDLRERICIGSMTAMETAVYQKVPTDEAEAQMLASADLDDMKSHRFEDNPGVRRHLVKKSSRCQLPRSSN--GSPPLSSLKRRKRMDKKTHEVFVELNELIV     | 284                                                           |    |
| hbAe3 | GEKSRP-----WSPSASYDLRERLCPGSALGNPGGPEQVPTDEAEAQMLGASADLDDMKSHRLEDNPGVRRHLVKKPSRTQGGRGSPSGLAPILRRRKRKKKLDKRRPHEVFVELNELML    | 330                                                           |    |
| rbAe3 | TEKSRP-----WSPSASYDLRERLCPGSALGNPG-PEQRVPTDEAEAQMLGASADLDDMKSHRLEDNPGVRRHLVKKPSRIQGGRGSPSGLAPILRRRKRKKKLDKRRPHEVFVELNELML   | 329                                                           |    |
| zAe3  | DKNQEMRWKERARWIKFEDVEEETDRWGKPHVASLSFRSLELRRTITHGAIMLDDQSTLPGIAHLMVETMISDQIRAEDRANVLRALLKHSHPNDEKE-GLFHRNHSVTSLSGFR         | 403                                                           |    |
| hbAe3 | DRSQEPHWRETARWIKFEDVEEETDRWGKPHVASLSFRSLELRRTIAHGAALLDLEQTTLPGIAHLMVETMIVSDQIRPEDRASVLRLLLLKHSHPNDDKDSGFFPRNPSSSSMNSVL      | 450                                                           |    |
| rbAe3 | DRSQEPHWRETARWIKFEDVEEETDRWGKPHVASLSFRSLELRRTIAQGAALLDLEQTTLPGIAHLMVETMIVSDQIRPEDRASVLRLLLLKHSHPNDDKDSGFFPRNPSSSSVNSVL      | 449                                                           |    |
| zAe3  | HNHN----HVHDTSLPLVSQDHEEMHDSKAAEHD-KEKSLHPIPAEGHAASRSKLLAKIPKDAEATVVLVGVVEFLEKPAAMAFVRLNESILLESILEVVPPIRFIVVLLGPTQTNDVYH    | 518                                                           |    |
| hbAe3 | GNHHPTPSHGPDGAVPTMADDLGEPAPLWPHDPDAKEKPLHMPGGDGRGK-SLKLEKIPEDAETVVLVGVVPFLEQPAAAFVRLNEAVLLESVLEVPVVRFLFVMLGPSHTSTDYH        | 569                                                           |    |
| rbAe3 | GNHHPTPSHGPDGAVPTMADDLGEPAPLWPHDPDAKEKPLHMPGGDGRGK-SLKLEKIPEDAETVVLVGVVPFLEQPAAAFVRLSEAVLLESVLEVPVVRFLFVMLGPSHTSTDYH        | 568                                                           |    |
| zAe3  | EIGRSFSTLMSDKNFHEVAYFADDRQDLLNGINEFLDCSIVIPPSDVEGKDLLKTVASFQKQMLRKRKERELKCASTVTGALET-KDVNIEEQEEDQFDVDPDKRSVIPFGGLIHD        | 637                                                           |    |
| hbAe3 | ELGRSIATLMSDKLFHEAAYQADDRQDLLSAISEFLDGSIVIPSEVEGRDLLRSVAAFQRELLRKRREREQTKVEMTRGGYTAPGKELSLELGGSEATPEDDPLLRGTSVFGGLVRDV      | 689                                                           |    |
| rbAe3 | ELGRSIATLMSDKLFHEAAYQADDRQDLLGAISEFLDGSIVIPSEVEGRDLLRSVAAFQRELLRKRREREQTKVEMTRGGYVAPGKELSLEMGGSEATSEDDPLQRTGTSVFGGLVRDV     | 688                                                           |    |
| zAe3  | RRRYPRYISDLKDALDTCIAAVFIYFAALSPTITFGGLGKTEQGMGVSELIISTATVGVLFSLLAGOPLLIIGFSGPLLVEEAFYKFCQAQGFYLTGRVWIGFWLIFIVLVIVA          | 757                                                           |    |
| hbAe3 | RRRYPHYPSDLRDALHSQVAAVLFYFAALSPTITFGGLGKTEGLMGVSELIVSTAVLGVLFSLLAGOPLLVVGFSGPLLVEEAFYKFCRAQDLEYLTGRVWVGLVWVFLALVA           | 809                                                           |    |
| rbAe3 | KRRYPHYPSDLRDALHSQVAAVLFYFAALSPTITFGGLGKTEGLMGVSELIVSTAVLGVLFSLLAGOPLLVVGFSGPLLVEEAFYKFCRAQDLEYLTGRVWVGLVWVFLALVA           | 808                                                           |    |
| zAe3  | AEGSFLVRYISPFTQEIFAFLISLIFIYETFSKLIKVFQEHPLMMSYT-SAAFKHSQDQSSVIGEPI-----LNQPNTALLSMVLMGTFFTAFFLRKLNRNRFLLGGKVRVIGD          | 867                                                           |    |
| hbAe3 | AEGSFLVRYISPFTQEIFAFLISLIFIYETFYKLYKVFTEHPLLPFYPPPEGALEGLDAGLEPNGSALPPTTEGPPSPRNQPNTALLSLILMLGTFFFIAFFLRKFRNSRFLGGKARRIIGD  | 929                                                           |    |
| rbAe3 | AEGSFLVRYISPFTQEIFAFLISLIFIYETFFKLYKVFTEHPLLPFYPPPEEAE-----PGLLELNSALPPTTEGPPGPRNQPNTALLSLILMLGTFLLIAFFLRKFRNSRFLGGKARRVIGD | 924                                                           |    |
| zAe3  | FGIPISILISVLVDILIPDTYTQKLNVPSSGFSVTSPPDKRGWFI SPPGDKQFPVWMMGASVIPALLVFLIFMETQITTLIVSKKERRLMKSGGFHLDLLIVTLGAIPLFGLPWLTA      | 987                                                           |    |
| hbAe3 | FGIPISILVMVLVDYSITDITYTQKLTVPGLSVTSPDKRSWFI PPLGSRPFPVWMMVAAVALLVLLIFMETQITLIVSQKARRLLKSGGFHLDLLIGSLGGLGLFGLPWLTA           | 1049                                                          |    |
| rbAe3 | FGIPISILVMVLVDYSITDITYTQKLTVPGLSVTSPHKRTWFI PPLGSRPFPVWMMVAAVALLVLLIFMETQITLIVSQKARRLLKSGGFHLDLLIGSLGGLGLFGLPWLTA           | 1044                                                          |    |
| zAe3  | TVRSVTHVNALTVMSKATAPGEKPMIQEVKEQRVTGMQVAILVGLSIVMTDVLRHIPLAVLFGIFLYMGITSLTGIQLYERITLMTVPKAKHHPDHVYTKVKTWRMMFTVIQLLCIVLL     | 1107                                                          |    |
| hbAe3 | TVRSVTHVNALTVMRTAIAPGDKPQIQEVREQRVTGVLIASLVGLSIVMGAVLRRIPLAVLFGIFLYMGVTSLSGIQLSQRLLLILMPAKHHPDQPYVTKVKTWRMHLFTCIQLGCIALL    | 1169                                                          |    |
| rbAe3 | TVRSVTHVNALTVMRTAIAPGDKPQIQEVREQRVTGVLIASLVGLSIVMGAVLRRIPLAVLFGIFLYMGVTSLSGIQLSQRLLLIFMPAKHHPDQPYVTKVKTWRMHLFTFIQLGCIALL    | 1164                                                          |    |
| zAe3  | WVKSTVASLAFPPFILIMTVPLRRLILTRIFEERELAALDADESPNFDEDGRDEYNEIHMLV                                                              | 1170                                                          |    |
| hbAe3 | WVKSTAASLAFPPFLLLTVPLRRCLLPRLFQDRELQALDSEDAEPNFDEDGQDEYNEIHMPV                                                              | 1232                                                          |    |
| rbAe3 | WVKSTVASLAFPPFLLLTVPLRRCLLPRLFQDRELQALDSEDAEPNFDEDGQDEYNEIHMPV                                                              | 1227                                                          |    |
