# Supplementary material
Source: PubMed Central journal article supplement (PMC4113327)
Supplement: NIHMS605043-supplement-4.pdf [file NIHMS605043-supplement-4.pdf]

# Supplemental Figure 2

|        |                                                  |                                                                                         |                                                        |                                                 |                   |                           |                       |                     |       |           |             |       |        |         |        |     |     |     |    |    |   |     |      |   |       |      |
|--------|--------------------------------------------------|-----------------------------------------------------------------------------------------|--------------------------------------------------------|-------------------------------------------------|-------------------|---------------------------|-----------------------|---------------------|-------|-----------|-------------|-------|--------|---------|--------|-----|-----|-----|----|----|---|-----|------|---|-------|------|
| z_Ae3  | -----MGRSYNEKDFEYHRHTFHHTHPLSTHLP-PQ             | RFRKRV-LSM                                                                              | RRRKRK                                                 | 47                                              |                   |                           |                       |                     |       |           |             |       |        |         |        |     |     |     |    |    |   |     |      |   |       |      |
| ti_Ae3 | MATGGHAPDIDVLINLQQVRVEEDEDG                      | V-----EDQEEEEENWEKALSVERFADIISDSASTSGDRMGRHYTEKDFEYHRHTFHHMHPLSTHLPV                    | QRLRKRKRV-HSME                                         | KRRKKK                                          | 113               |                           |                       |                     |       |           |             |       |        |         |        |     |     |     |    |    |   |     |      |   |       |      |
| fu_Ae3 | MATGGHVPEIDVLVNLQQVKEVEDEEGSM-----EEQEEEEENLEKTL | SVERFGDIISDSTSSSSGRMGRNYTEKDFEYHRHSFHHTHPLSTHLP                                         | PLPQRLRKRKRV-HSMD                                      | RRRKRK                                          | 113               |                           |                       |                     |       |           |             |       |        |         |        |     |     |     |    |    |   |     |      |   |       |      |
| sk_Ae3 | MATSGSKDPPRVLT                                   | CSPLAEDEVGPEATEVVGEEEEEEEEEEDEDLDRLLPVDHLGDLLSDLPRPQPE---RTYNEKDFEYHRRSLHIRHPLSARLP     | PHVCI                                                  | RRRKRKRVHSER                                    | KRRKRK            | 117                       |                       |                     |       |           |             |       |        |         |        |     |     |     |    |    |   |     |      |   |       |      |
| z_Ae3  | RRKKKTSMPPSDVPTIHEVDEEEAES                       | IFGQQAATPTEPSEELPQLSLGSEEDLAADLPLSSFHMES-ERPASSEETLPSPASMEEKEET-----QQPPDGGEHKDISNSFSPS |                                                        |                                                 | 157               |                           |                       |                     |       |           |             |       |        |         |        |     |     |     |    |    |   |     |      |   |       |      |
| ti_Ae3 | RRKKKTSLPPSDVPTIHEVDEEEAES                       | TEGQGVAAATPTELPEIQPQFSLGSQEDLGEPLHHTIVHTE                                               | NVEQPLSRKT                                             | T----ALTLIKEAAHNGGITVTGQNDMDGGEAA               | CNSVPSGS          | 229                       |                       |                     |       |           |             |       |        |         |        |     |     |     |    |    |   |     |      |   |       |      |
| fu_Ae3 | RRKKKTSLPPSDVPTIHEVDEEEA                         | QSDTGGQVAATPTEPPDLQPQFSLGSQEDLEELPLTSFHV                                                | N-E-HLSTGKA                                            | ----ASMEIKAE                                    | THNGKIPVVGQNR     | EDGEETA                   | CSSIPPS               | 227                 |       |           |             |       |        |         |        |     |     |     |    |    |   |     |      |   |       |      |
| sk_Ae3 | RRKKTSLPPSGVTP                                   | TIQEVDEEEHGEGLGSEEEARDKEVS-----ASERTRDSP----TSHLAS-----QEST                             | ----ESLLIERTS                                          | -----TPPEGPMEP                                  | QRESTQSSLDAR      | 209                       |                       |                     |       |           |             |       |        |         |        |     |     |     |    |    |   |     |      |   |       |      |
| z_Ae3  | PEASMTTRGWFRKRPVH-RLAGAQR                        | TSYDLRERICIGSMTAMETAVYQKVP                                                              | TDEAEAQMLASADLDDMKSHRFEDNPGVRRHLVKKSSRCQLPRSSNGSPPLSSL | KRRKRM-D                                        | KKTHEV            | 275                       |                       |                     |       |           |             |       |        |         |        |     |     |     |    |    |   |     |      |   |       |      |
| ti_Ae3 | DPSSVTPHGWFRKRPVHRL                              | LLGTQRSNYDLRERICIGSMTALETAVYQVPT                                                        | TDEAEAQMLVSADLDDMKSHRFEDNPGVRRHLVKKSSRCHMSRTS          | NSSTPL                                          | CSL               | KKKRAEK                   | KKTHEL                | 349                 |       |           |             |       |        |         |        |     |     |     |    |    |   |     |      |   |       |      |
| fu_Ae3 | DPSPSSTHSC                                       | FRRRPVHHRMAGAQR                                                                         | SNYDLRERICIGSMTALETAVYQVPT                             | TDEAEAQMLASADLDDMKSHRFEDNPGVRRHLVKKSSRCQISRASNS | STPLSSL           | KKKRAAD                   | KKTHEL                | 347                 |       |           |             |       |        |         |        |     |     |     |    |    |   |     |      |   |       |      |
| sk_Ae3 | DNSPP----                                        | SCAKRRSLH-RTPGAQR                                                                       | PRYDLQERVICIGSMTASGAAIFQKVP                            | TDEAEAEMLA                                      | VVDLVYMKSHRFEDHPG | VRRHLVKKPSKGQMSKNTSK      | ---MHQTGPR            | KKSKL               | KK    | PHEV      | 321         |       |        |         |        |     |     |     |    |    |   |     |      |   |       |      |
| z_Ae3  | FVELNELIVDKNQEMRWKERARWIK                        | FEEDVVEETDRWGKPHVASLSFRS                                                                | LLELRRITITHGAIMLDDLDQSTLPGIAHLMVETMISDQIR              | AEADRANVLRALLLKHSHPNDEKEGLFHRNHS                | 395               |                           |                       |                     |       |           |             |       |        |         |        |     |     |     |    |    |   |     |      |   |       |      |
| ti_Ae3 | FVELNELIVEKDHEMRWKERARWIK                        | FEEDVDEETDRWGKPHVASLSFRS                                                                | LLELRRITITHGAILLDLEQSTLPGIAHLVETMISDQI                 | KAEDRPNVLRALLLKHSHLSDHKT-RFHRHHS                | 468               |                           |                       |                     |       |           |             |       |        |         |        |     |     |     |    |    |   |     |      |   |       |      |
| fu_Ae3 | FVELNELIVEKDHEMRWKERARWIK                        | FEEDVVEETDRWGKPHVASLSFRS                                                                | LLELRRITITHGAILLDLEQNSLPGIAHLVETMISDQI                 | RAEDRPSVLRALLLKHSHPSDLKH-RFHRHQ                 | 466               |                           |                       |                     |       |           |             |       |        |         |        |     |     |     |    |    |   |     |      |   |       |      |
| sk_Ae3 | FVELNELVVDKNNEMTQ                                | ETARWIKFEEDVVEETDKWGKPHVASL                                                             | TFRSLELRRITIAQGAVLLDLEQKTLPGIAHLVETMISDQI              | KAEDRANVLRALLVKHSHPNDEKEGSFFPRTG                | 441               |                           |                       |                     |       |           |             |       |        |         |        |     |     |     |    |    |   |     |      |   |       |      |
| z_Ae3  | VTSL-GSFRHNHNHVHDT-----SLPLVSQDHEEMHDSKAAEH      | DKE-----KSLHPIPAEGH-AASRSLKLLAKIPKDAEATVVLVGC                                           | VEFLEK                                                 | PAMAFVRLNESILLESILE                             | 496               |                           |                       |                     |       |           |             |       |        |         |        |     |     |     |    |    |   |     |      |   |       |      |
| ti_Ae3 | SGSLHGSF--NHNHVHDT-----NQPLVSEEHDEHHEKGPVYDPKQDV | FSVLSFKSLHPLP-ETHPATARSIKLLAKIPKDAEAVIVLVC                                              | VEFLEQ                                                 | PAMAFVRLSEAVLLESVLE                             | 576               |                           |                       |                     |       |           |             |       |        |         |        |     |     |     |    |    |   |     |      |   |       |      |
| fu_Ae3 | SASLHGSF--NHNHVQDT-----NLPLVTEEHSDGKGPVYDPKQDV   | FSVLSFKSLHPLPESPNAARSMKLLAKIPKDAEAVIVLVC                                                | VEFLEQ                                                 | PAMAFVRLNEAVLLESVLE                             | 575               |                           |                       |                     |       |           |             |       |        |         |        |     |     |     |    |    |   |     |      |   |       |      |
| sk_Ae3 | SSSVSSVL--GNHHLHHEHYPSNDQVITLPLMEEERAQSD         | SKTLES                                                                                  | SQN-----TARHTSQQSERHMTKSEIKLLRQIPD                     | NAEATVVLIGTLAFLEQPTMAFVRLSEGVLLDSVLE            | 552               |                           |                       |                     |       |           |             |       |        |         |        |     |     |     |    |    |   |     |      |   |       |      |
| z_Ae3  | VPVPIRFIFVLLGPTQTNVDYHEIGRSF                     | STLMSDKNFHEVAYFADDRQDLLNGINEFLD                                                         | CSIVIPPSDVEGKDLLKTVASFQKQMLRKRKERELK                   | CASTVTGALET                                     | KDVNIEEQEED       | 616                       |                       |                     |       |           |             |       |        |         |        |     |     |     |    |    |   |     |      |   |       |      |
| ti_Ae3 | VPVVRVRFIFVLLGSPQSNMDYHEIGRSF                    | STLMSDKNFHEVAYFADDRQDLLNGINEFLDYSIVIPPSDVEGKDLLKTVAD                                    | FQKQMLRKRKERELK                                        | KHSSLI-GVESEIK                                  | EVSP-E            | EEEEEG                    | 694                   |                     |       |           |             |       |        |         |        |     |     |     |    |    |   |     |      |   |       |      |
| fu_Ae3 | IPVVRVRFIFVLLGSPQSNVDYHEIGRSF                    | STLMSDKNFHEVAYFADDRQDLLNGINEFLDYSIVIPPSDVEGKDLLKTVAD                                    | FQKQMLRKRKERELK                                        | HQS                                             | SVL-GIELNNKE      | IS                        | PEEEEEEG              | 694                 |       |           |             |       |        |         |        |     |     |     |    |    |   |     |      |   |       |      |
| sk_Ae3 | VSVVRFIFVLLGSPQSNIDYHEIGRSISTLMSDKNFHEAAYL       | ADDRQDLLNAINEFLD                                                                        | CSIVIPPLELEGRDLLRSVTSFQKEMLRKRKERELK                   | SKLKE-ESVLEIK                                   | DMCV-ELRED-       | 669                       |                       |                     |       |           |             |       |        |         |        |     |     |     |    |    |   |     |      |   |       |      |
| z_Ae3  | QFDVPLKRS                                        | GPIFGGLIHDIRRRYP                                                                        | PRYISDLKDALD                                           | TQCIAAVIFIFYAALSPTITFGGLLGEK                    | TQGMG             | VS                        | ELIISTATVGVLS         | FSLLAGQPLLIIGFSGPLL | VFE   | EAFYK     | Q           | QAQ   | GFE    | 736     |        |     |     |     |    |    |   |     |      |   |       |      |
| ti_Ae3 | EQEVDPLKRS                                       | GMPFGGLIHDIRRRYP                                                                        | QYVSDLKDALDMQ                                          | CIAAVIFIFYAALSPTITFGGLLGEK                      | TEGMG             | VT                        | ELIVSTATIGVIFSLFAGQPL | LITG                | SGPLL | VFE       | EAFYK       | Q     | QVY    | NFE     | 814    |     |     |     |    |    |   |     |      |   |       |      |
| fu_Ae3 | DQEVDPLKRS                                       | GPIFGGLIHDIRRRYP                                                                        | PHYVSDLKDALD                                           | TQCIAAVIFIFYAALSPTITFGGLLGEK                    | TEGMG             | VT                        | ELIVSTATLGVIFSLLAGQPL | LIIGFSGPLL          | VFE   | EAFYK     | Q           | QAY   | NFE    | 814     |        |     |     |     |    |    |   |     |      |   |       |      |
| sk_Ae3 | -VEVDSLERTN                                      | RLFGGLIRDVRRYP                                                                          | QYLSDIRDAFN                                            | VQCLAAIFIFYAALSPAITFGGLLGA                      | TEGLIGVSELIV      | STS                       | IMGIVFSLLAGQPL        | LIIGFTGPLL          | VFE   | EAFY      | NF          | SKD   | Q      | HD      | 788    |     |     |     |    |    |   |     |      |   |       |      |
| z_Ae3  | YLTGRVWIGFWLIFIVLVIVA                            | AEGSFLVRYISPTQEIFAFLISLIF                                                               | IYETFS                                                 | KLIKVFQEHPLMSY                                  | TSAAFKHS          | DQRGSSVI--GEPILNQ         | PNTALLSMVLM           | MGTFF               | TAFFL | RKLRNS    | 854         |       |        |         |        |     |     |     |    |    |   |     |      |   |       |      |
| ti_Ae3 | YLTGRVWIGFWLIFIVLVIVA                            | AEGSFLVRYISPTQEIFAFLISLIF                                                               | IYETFS                                                 | KLIKVFK                                         | KEHPLMAV          | YPT-----DASGSQNL--DGPIYNQ | PNTALLSLVLM           | MGTFF               | VAF   | FLRFRNS   | 926         |       |        |         |        |     |     |     |    |    |   |     |      |   |       |      |
| fu_Ae3 | YLTGRVWIGFWLIFIVLVIVA                            | AEGSFLVRYISPTQEIFAFLISLIF                                                               | IYETFS                                                 | KLKVF                                           | KEHPLMSV          | YPS-----DATTANGF          | HDDHLVFNQ             | PNTALLSLVLM         | MGTFF | LAF       | FLRKLNS     | 928   |        |         |        |     |     |     |    |    |   |     |      |   |       |      |
| sk_Ae3 | YLTGRVWIGFWL                                     | MFIVLITVALEGSFLVRYVTP                                                                   | TQEIFAFLISAFI                                          | IYETFK                                          | LLIVFAAHP         | LLKSYV                    | ---FPELEGN            | VT                  | KDL   | ----VVIMQ | PNTALLSLVLM | VGTFF | TAY    | FLRKLNS | 902    |     |     |     |    |    |   |     |      |   |       |      |
| z_Ae3  | RFLGGKVR                                         | RIVGDFGIPISILISVLVDILIP                                                                 | DTYTQKLVN                                              | PSGFSVTS                                        | PD                | KRGW                      | FISPF                 | GDKQ                | FP    | PVMMGAS   | VIPALLV     | FILIF | METQIT | TTLIV   | SKKERR | LMK | SGF | HLD | LL | IV | T | LGA | 974  |   |       |      |
| ti_Ae3 | RFLGGKARR                                        | IIGDFGIPISILVSVLVDYAIT                                                                  | DTYTQKLVN                                              | PSGFSVTS                                        | PD                | KRGW                      | FISPF                 | GDK                 | FP    | PTWMMGAS  | VVPALLV     | FILIF | METQIT | SLIV    | SKKERR | LVK | SGF | HLD | LL | IV | L | LGA | 1046 |   |       |      |
| fu_Ae3 | RFLGGKARR                                        | IIGDFGIPISILVFMDCS                                                                      | IPDTYTQKLVN                                            | PSGFSVTS                                        | PD                | KRGW                      | FISPF                 | GDKQ                | FP    | PTWMMGAS  | VVPALLV     | FILIF | METQIT | SLIV    | SKKERR | LVK | SGF | HLD | LL | IV | L | LGA | 1048 |   |       |      |
| sk_Ae3 | RFLAGSVRR                                        | TIGDFGIP                                                                                | IAILLVLLVDISVP                                         | DTYTEKLVN                                       | PLHFS             | VTAPE                     | KRRWF                 | IHPL                | GK    | NG        | FI          | WMI   | F      | GA      | IA     | P   | ALL | L   | L  | L  | L | L   | L    | L | IGVGG | 1022 |

z\_Ae3 ICPLFGLPWLTAATVRSVTHVNALTVMSKATAPGEKPMIQEVKEQRTGMCVAILVGLSIVMTDVLRHIPLAVLFGIFLYMGITSLTGIQLYERITLMVTPAKHHPDHVYVTKVKTWRMN 1094  
 ti\_Ae3 LCPLFGLPWLTAATVRSVTHVNALTVMSKATAPGEKPMIQEVKEQRLTGLLVAVLVGMSIVMTDILRLIPLAVLFGIFLYMGVTSLTGIQLYERITLMVTPAKHHPDHIYVTKVKTWRMN 1166  
 fu\_Ae3 FCPLFGLPWLTAATVRSVTHVNALTVMSKATAPGEKPKIQEVKEQRLTGLLVAVLVGMSIVMTDVLRLIPLAVLFGIFLYMGVTSLTGIQLYERITLMVTPAKHHPDHIYVTKVKTWRMN 1168  
 sk\_Ae3 FCGIFGLPWQAAATVRSIAHVNALTVMSNSTAPGEKFRIQEVKEQRTGIVVAVLVGLSVVMSQVLRMIPMAVLFGIFLYMGVTSLTGIQIYERLLLMFVPSKLPDHVYVTKVRTWKMN 1142

z\_Ae3 MFTVIQLLCIVLLWVVKSTVASLAFPPFILIMTVPLRRLILTRIFEERELAALDADEDSPNFDEDGRDEYNEIHMLV 1170  
 ti\_Ae3 MFTIIQLACIVALWVVKSTAASLAFPPVLIMTVPLRRLILSRIFEERELQALDCDEDSPNFDEDGRDEYNEIHMLV 1228  
 fu\_Ae3 MFTTLQLGCIIITLWVVKSTTASLAFPPFILIMTVPLRRLILSRIFEERELQALDCDEDSPNFDEDGRDEYNEIHMLV 1232  
 sk\_Ae3 MFTCIQLFCITILWIKSTIISLAFPPFLLILTVPTRRYLLPKIFHERELMALDSDEIHPNFDEGDHDEYSEMHPQ 905
